# Supplementary material for: Lower Critical Solution Temperature Tuning and Swelling Behaviours of NVCL-Based Hydrogels for Potential 4D Printing Applications
Source: MDPI journal article supplement (doi:10.3390/polym14153155), 2022-08-02
Supplement: s1 [file s1]

## Supplementary Figures

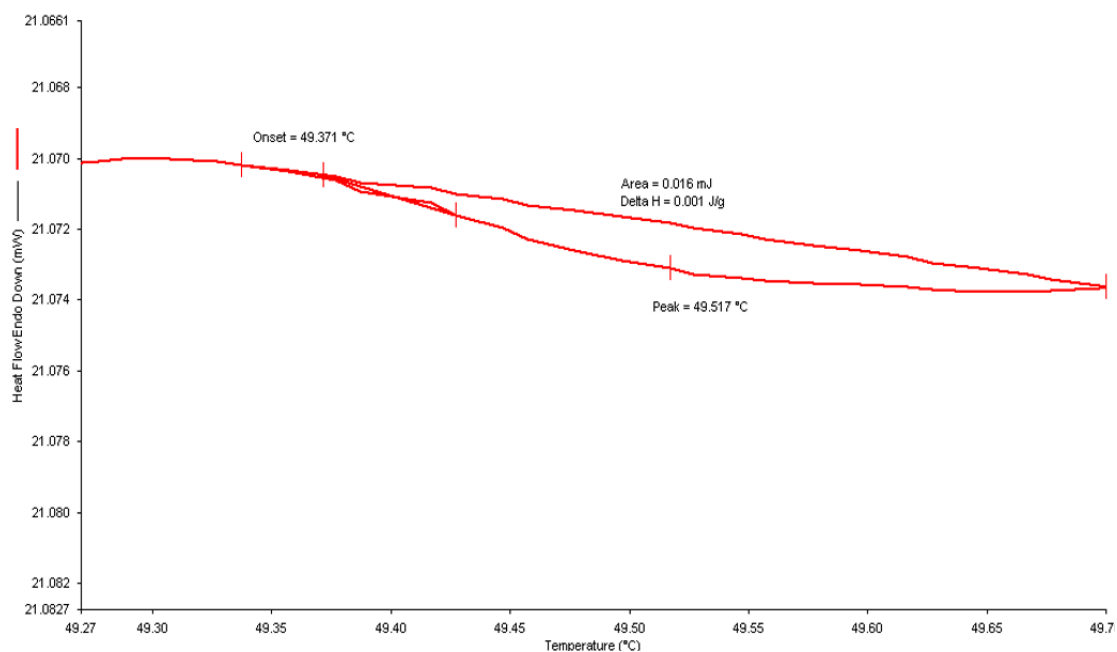

**Figure S1.** The thermogram illustrating the LCST of PNVP based copolymer S1 (30NVP/70NVCL) aqueous solution.

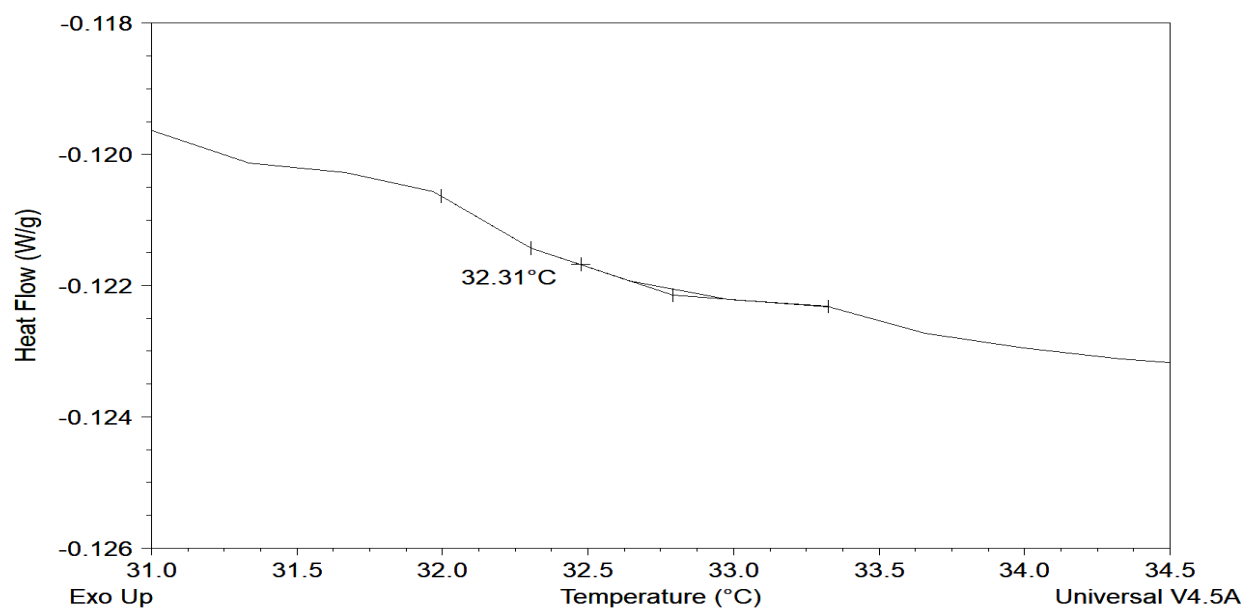

**Figure S2.** The thermogram illustrating the LCST of NVCL based copolymer S2 (30DMAAm/70NVCL) aqueous solution.

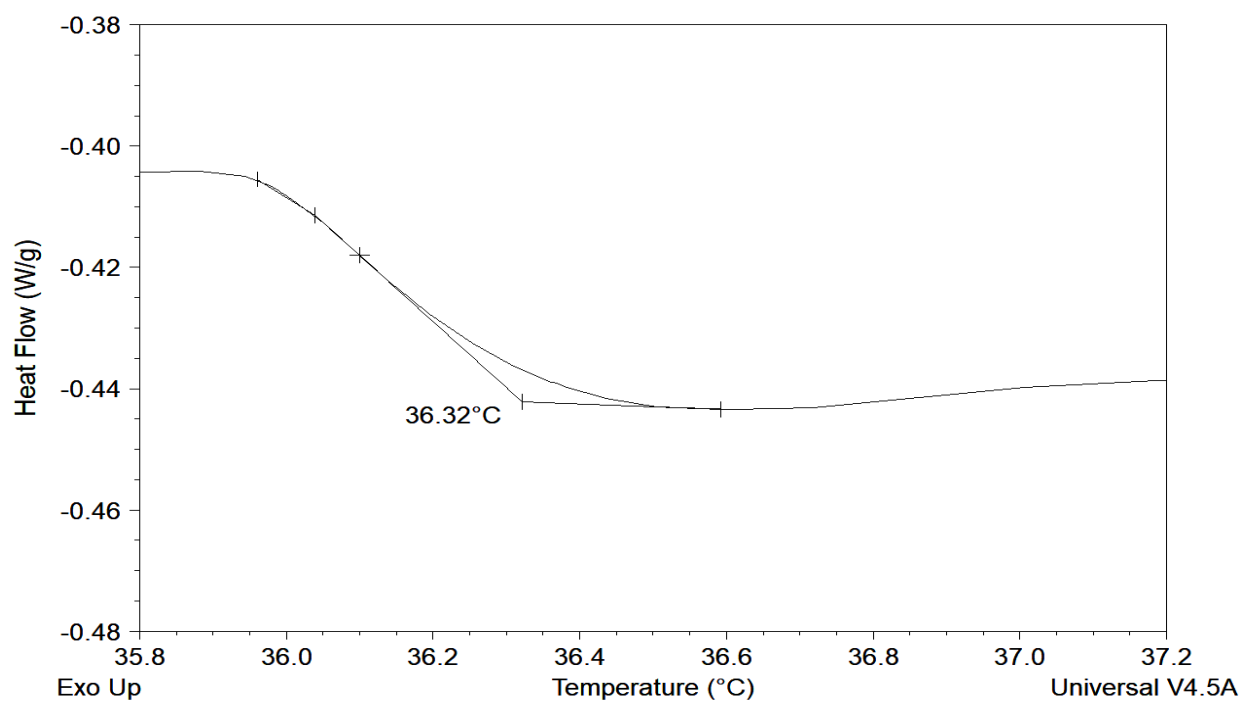

**Figure S3.** The thermogram illustrating the LCST of NVCL based terpolymer S3 (15NVP/15DMAAm/70NVCL) aqueous solution.
